# Supplementary material for: Mesoporous calcium oxide–silica and magnesium oxide–silica composites for CO2 capture at ambient and elevated temperatures
Source: Royal Society of Chemistry journal article supplement (doi:10.1039/c6ta03916b), 2016-01-01
Supplement: c6ta03916b1.pdf [file c6ta03916b1.pdf]

# Mesoporous calcium oxide-silica and magnesium oxide-silica composites for CO<sub>2</sub> capture at ambient and elevated temperatures

Chamila Gunathilake and Mietek Jaroniec\*

Department of Chemistry and Biochemistry, Kent State University, Kent, Ohio 44242, USA  
E-mail: [jaroniec@kent.edu](mailto:jaroniec@kent.edu)

## Materials

Magnesium nitrate hexahydrate Mg(NO<sub>3</sub>)<sub>2</sub>·6H<sub>2</sub>O and calcium nitrate tetrahydrate Ca(NO<sub>3</sub>)<sub>2</sub>·4H<sub>2</sub>O were purchased from Acros Organic, New Jersey. Pluronic P123 (EO<sub>20</sub>PO<sub>70</sub>EO<sub>20</sub>) triblock copolymer was donated by BASF Corporation, Florham Park, New Jersey. 95 % Ethanol and 36 % HCl, were purchased from Fisher Scientific, Pittsburgh, Pennsylvania. Tetraethylorthosilicate (TEOS) was purchased from Gelest Inc., Morrisville, Pennsylvania. CaCO<sub>3</sub> and MgCO<sub>3</sub> were purchased from Sigma-Aldrich St. Louis, MO. Deionized water (DW) was obtained using in house Ion pure Plus 150 Service Deionization ion-exchange purification system. All reagents were analytical grade and used without further purification.

## Characterization

Characterization procedures provided below are analogous to those reported in [1-3]. Nitrogen adsorption isotherms were measured at -196 °C on an ASAP 2010 volumetric analyzer (Micromeritics, Inc., Norcross, GA). Prior to adsorption measurements, all samples were out gassed under vacuum at 110 °C for 2 h.

High resolution thermogravimetric measurements were recorded on TGA Q-500 analyzer (TA Instruments, Inc., New Castle, DE). Thermogravimetric (TG) profiles were recorded from 25 to 800 °C in flowing nitrogen with a heating rate of 10 °C / min using a high resolution mode. The weight of each sample was typically in 5-20 mg range. The TG profiles were used to obtain information about the extent of the template removal.

Transmission electron microscopy (TEM) images were obtained on a FEI Tecnai G2 F20 microscope. Prior to TEM analysis, the sample powders were dispersed in ethanol by moderate sonication at concentrations of ~5 wt. %. A Lacy carbon coated, 200-mesh, copper TEM grid was dipped into the sample suspension and then dried under vacuum at 80 °C for 12 h. SEM images were taken on a Hitachi S-2600N scanning electron microscope (1-30 kV) using solid state back scattered electron detector. The energy dispersive X-ray spectroscopy (EDX) data

were recorded by using an integrated scanning TEM (STEM) unit with attached EDAX spectrometer.

$^1\text{H}$ - $^{29}\text{Si}$  cross polarization (CP) MAS NMR spectra were recorded at 9.4 T using Bruker Avance (III) 400WB NMR spectrometer (Bruker Biospin Corporation, Billerica, MA, USA) with MAS triple resonance probe head using zirconia rotors 4 mm in diameter. Frequencies of  $^1\text{H}$ - $^{29}\text{Si}$  (CP) MAS NMR spectra were recorded at 79.49 MHz for  $^{29}\text{Si}$  and 400.13 MHz for  $^1\text{H}$ . The MAS rate was 5 KHz.  $^1\text{H}$   $\pi/2$  pulse length was 4.5  $\mu\text{s}$  and pulse delay 3.0 s. Two pulse phase modulated TPPM15 decoupling sequence was used during acquisition. The  $^{29}\text{Si}$  chemical shifts were referenced to TMS (0 ppm).

### Calculations

The protocol of analysis of adsorption data is analogous as in [1-3]. The Brunauer-Emmett-Teller specific surface areas ( $S_{\text{BET}}$ ) were calculated from  $\text{N}_2$  adsorption isotherms in the relative pressure range of 0.05-0.2 using a cross sectional area of 0.162  $\text{nm}^2$  per nitrogen molecule. The single-point pore volume ( $V_{\text{sp}}$ ) was estimated from the amount adsorbed at a relative pressure of  $\sim 0.98$ . The pore size distributions (PSD) were calculated using adsorption branches of nitrogen adsorption-desorption isotherms by the improved KJS method calibrated for cylindrical pores [4]. The pore width ( $W_{\text{max}}$ ) was obtained at the maximum of the PSD curve. The micropore volume ( $V_{\text{mi}}$ ) was evaluated by integration of the PSD curve up to  $\sim 3$  nm.

### Isoelectric heat of adsorption.

The Clausius-Clapeyron relationship was employed to evaluate the isosteric heat of adsorption using the linear plots of  $\ln(P/P^0)$  as a function of  $1/T$  at constant values of the amount adsorbed  $a$ ; symbols  $P$ ,  $P_0$ , and  $T$  denote the equilibrium pressure, saturation vapor pressure, and temperature, respectively.

- (1) Gunathilake, C.; Jaroniec, M. Mesoporous organosilica with amidoxime groups for  $\text{CO}_2$  sorption. *Appl.Mater.Interfaces*. **2014**, 6, 13069–13078.
- (2) Gunathilake, C.; Jaroniec, M., Mesoporous alumina-zirconia-organosilica composites for  $\text{CO}_2$  capture at ambient and elevated temperatures. *J. Mater. Chem. A*. **2015**, 3, 2707-2716.
- (3) Gunathilake, C.; Gorka, J.; Dai, S.; Jaroniec, M. Amidoxime modified mesoporous silica for Uranium adsorption under seawater conditions. *J. Mater. Chem. A*. **2015**, 3, 11650-11659.
- (4) Kruk, M.; Jaroniec, M.; Sayari, A. Application of large pore MCM-41 molecular sieves to improve pore size analysis using nitrogen adsorption measurements. *Langmuir*, **1997**, 13, 6267-6273.

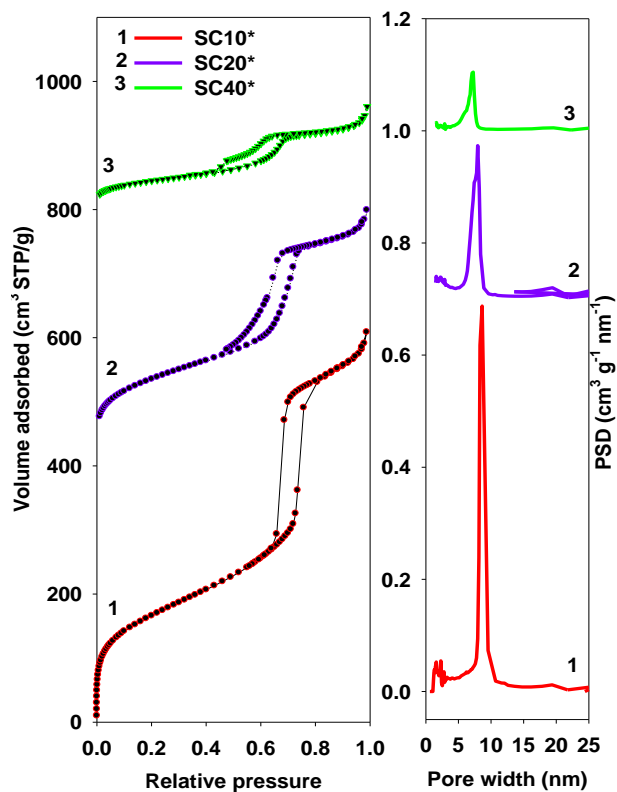

**Figure S1.** Nitrogen adsorption isotherms (left panel) and the corresponding PSD curves (right panel) for the SCX\* samples studied; isotherms curves 2 and 3 are shifted by 500 and 800 cm<sup>3</sup> STP / g, respectively, in relation to curve 1, while the PSD curves 2 and 3 are shifted by 0.7 and 1.0 cm<sup>3</sup> g<sup>-1</sup> nm<sup>-1</sup>, respectively, in relation to curve 1.

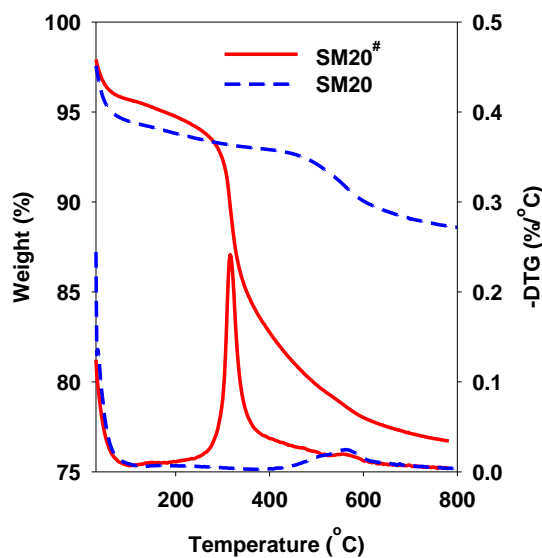

**Figure S2.** TG/DTG curves for the as-synthesized (SM20<sup>#</sup>) and thermally treated (SM20) samples.

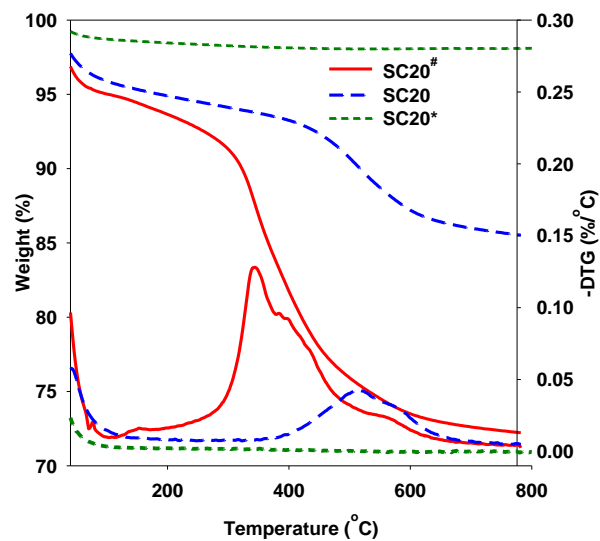

**Figure S3.** TG/DTG curves for the as-synthesized (#) and thermally treated (550 and 850 °C) SC20 samples.

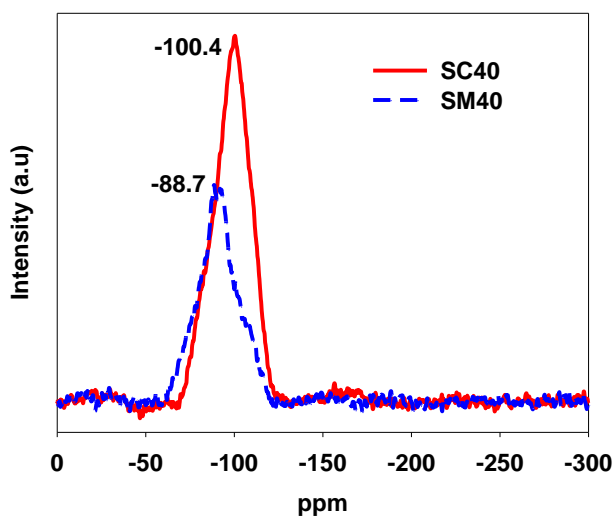

**Figure S4.**  $^1\text{H}$ - $^{29}\text{Si}$ -MAS NMR spectra of the SC40 and SM40 samples.

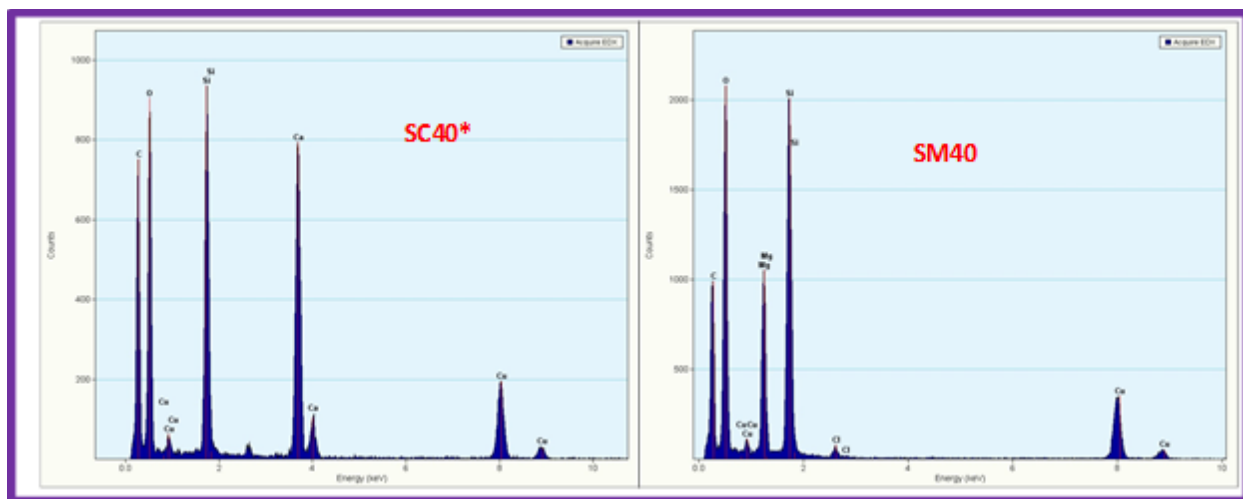

**Figure S5.** EDX images of the SC40\*(left panel) and SM40 (right panel) samples.

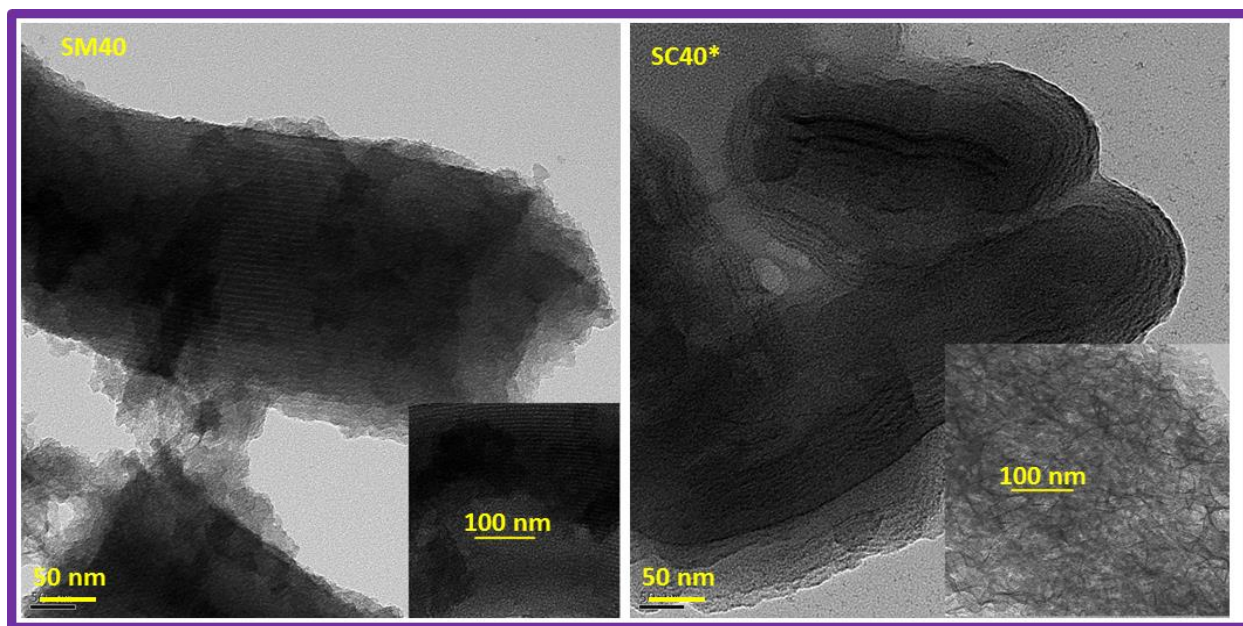

**Figure S6.** TEM images of the SM40 (left panel) and SC40\* (right panel) samples.

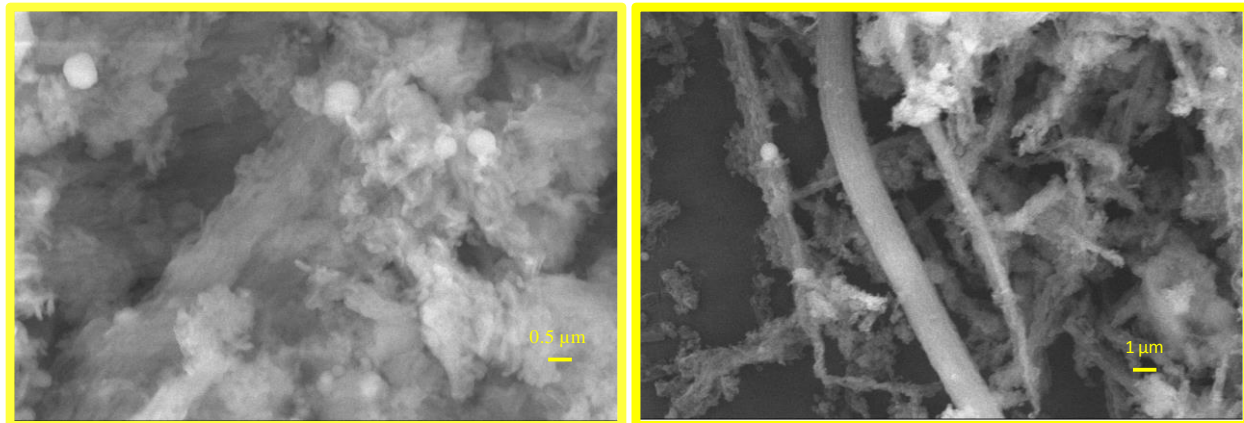

**Figure S7.** SEM images of the SM40 sample.

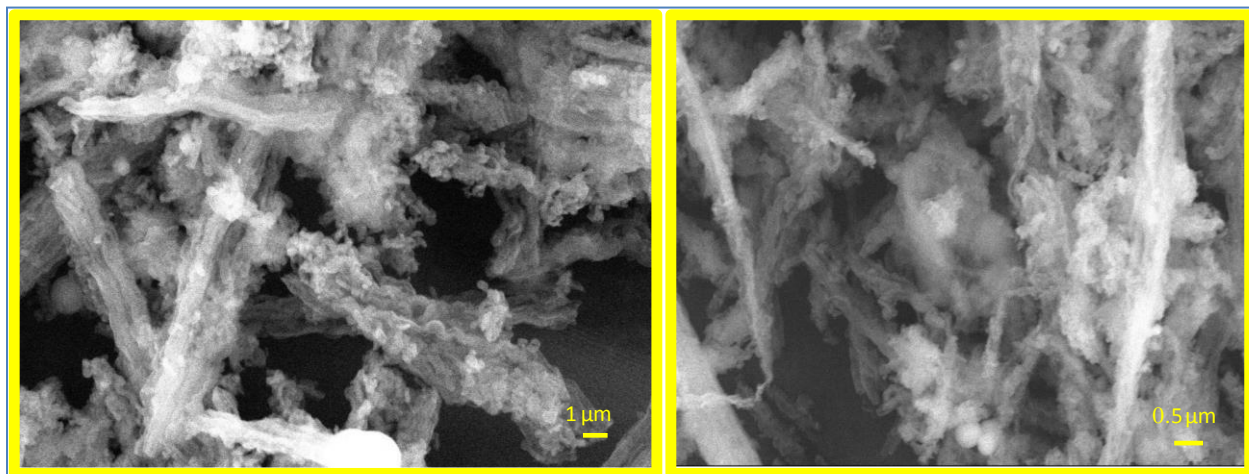

**Figure S8.** SEM images of the SC40\* samples.

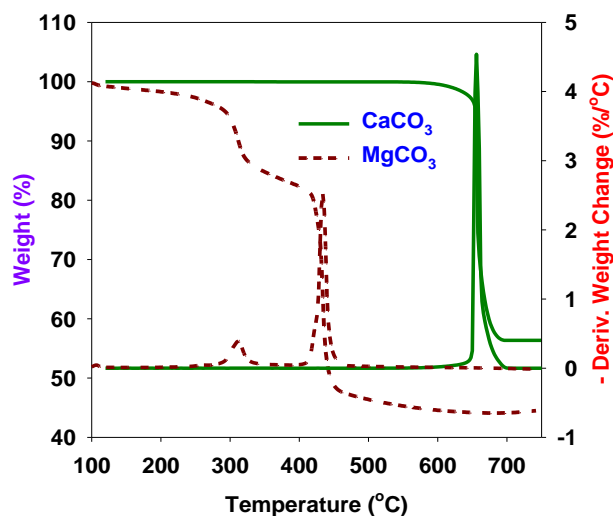

**Figure S9.** TG/DTG curves for commercially available  $\text{CaCO}_3$  and  $\text{MgCO}_3$  samples.

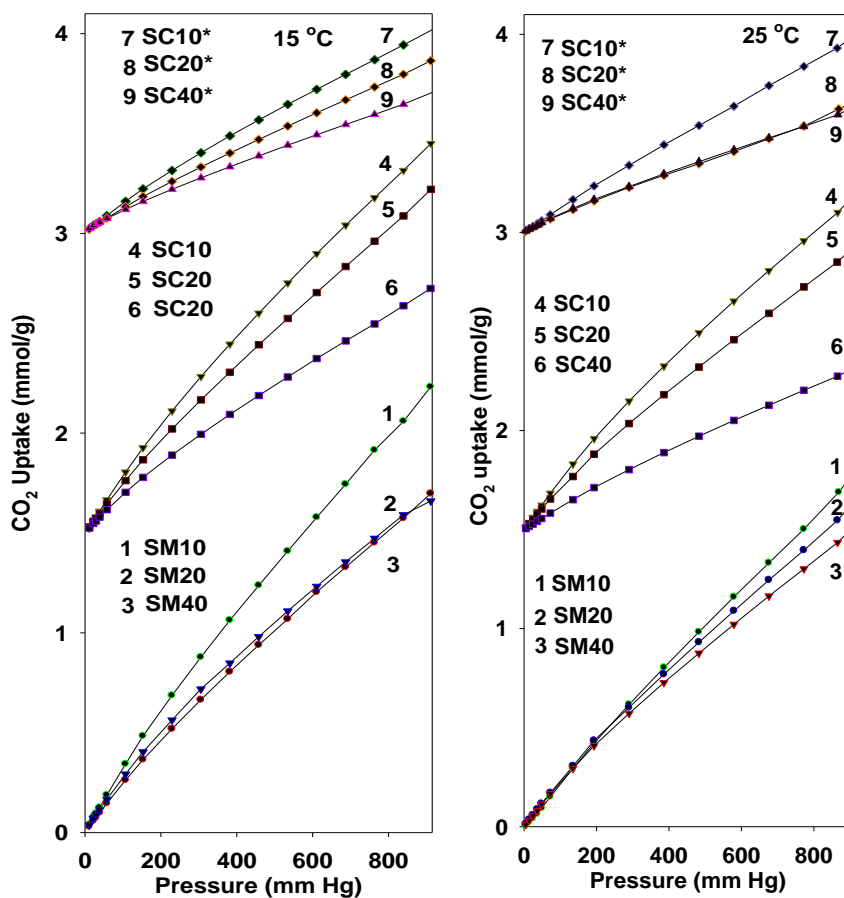

**Figure S10.**  $\text{CO}_2$  adsorption isotherms at  $15\text{ }^\circ\text{C}$  (left panel) and  $25\text{ }^\circ\text{C}$  (right panel) measured on the samples studied; isotherm curves 4,5,6 and 7,8,9 are shifted by 1.5 and 3 mmol/g, respectively, in relation to curves 1,2,3.

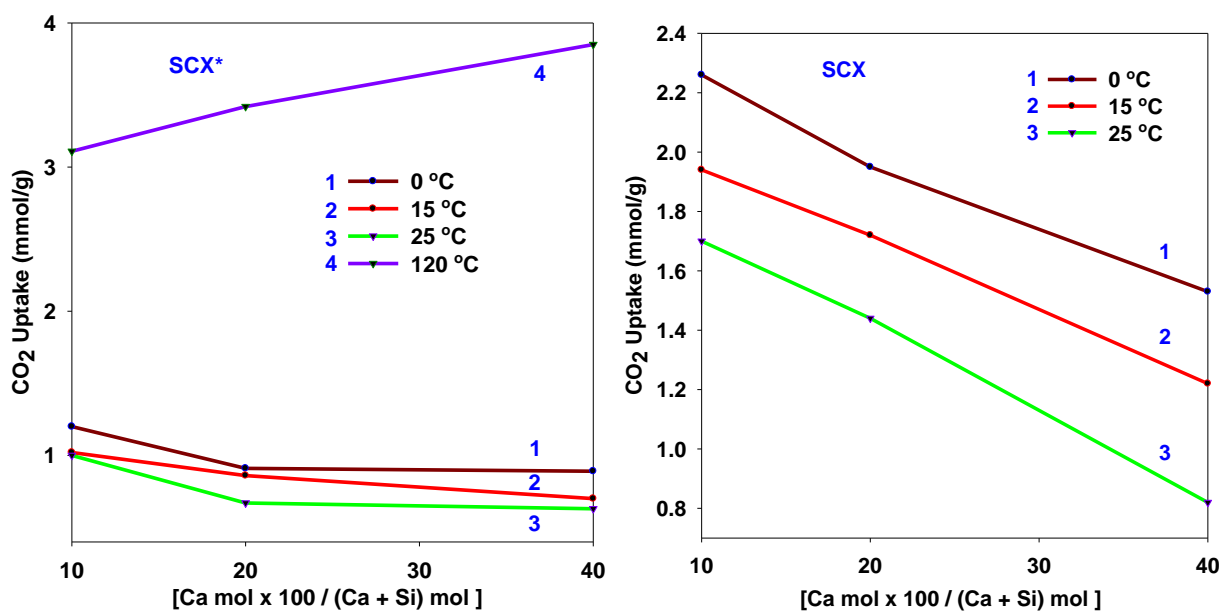

**Figure S11.** CO<sub>2</sub> uptake change with the molar percentage (X %) of Ca in the SCX\* (left panel) and SCX (right panel) (X=10,20,40) composites at different temperatures.

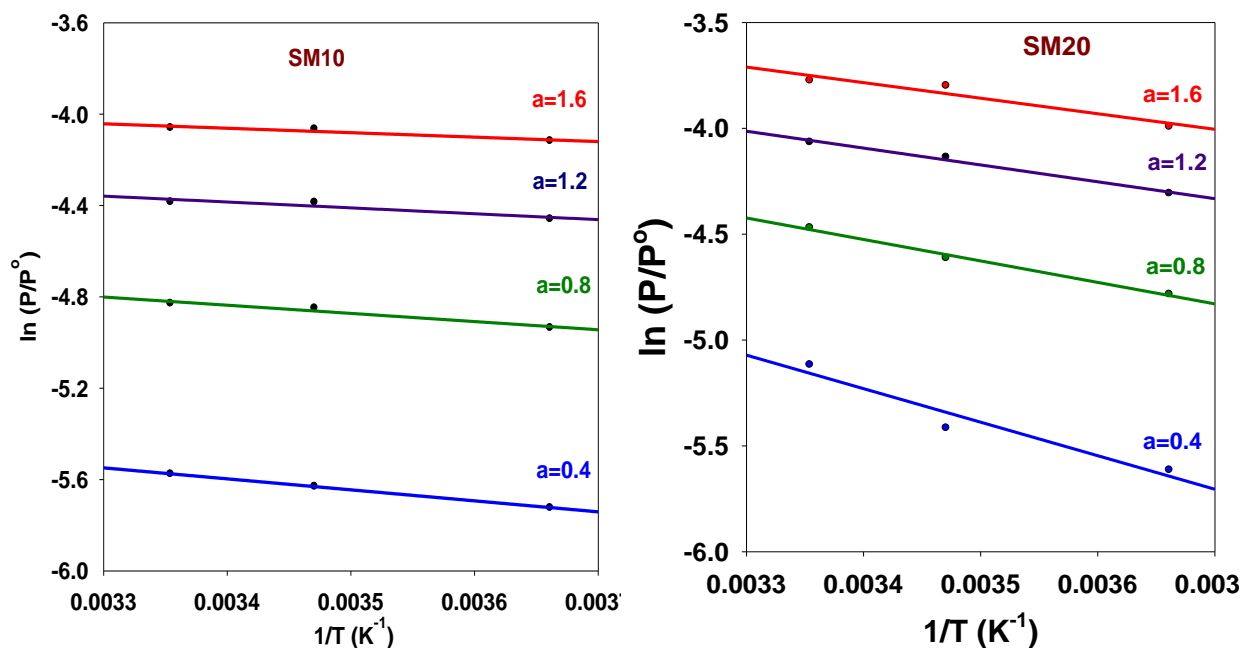

**Figure S12.** Variation of  $\ln(P/P^0)$  with  $1/T$  at  $a = 0.4, 0.8, 1.2, 1.6$  mmol/g for CO<sub>2</sub> adsorption on SM10 (left panel) and SM20 (right panel) samples.



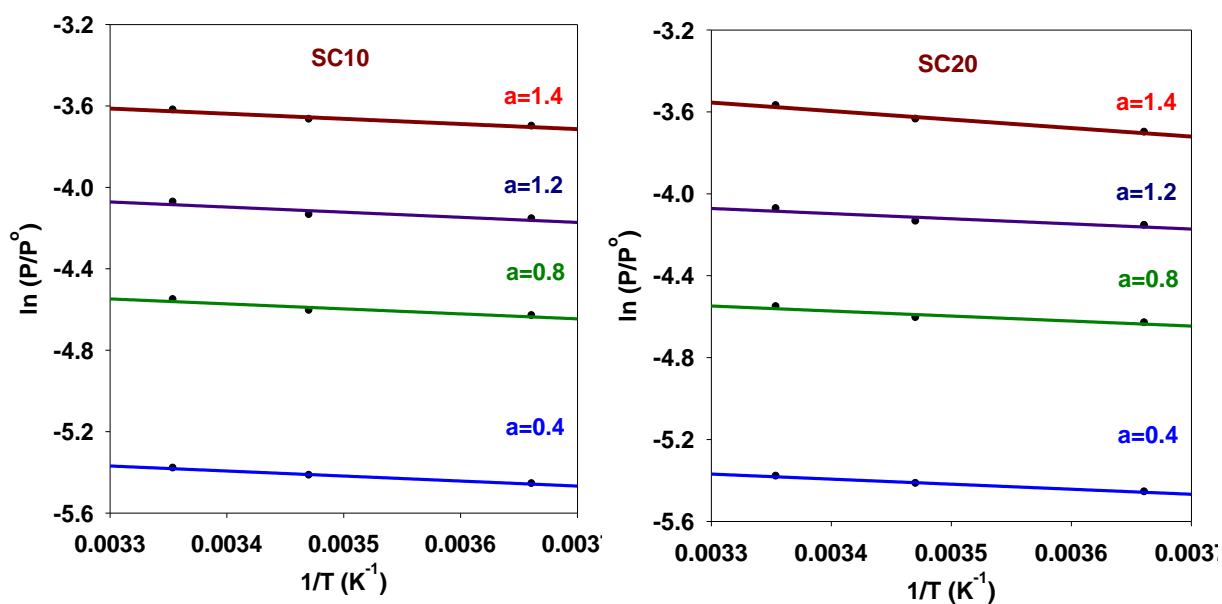

**Figure S13.** Variation of  $\ln(P/P^0)$  with  $1/T$  at  $a = 0.4, 0.8, 1.2, 1.6$  mmol/g for  $\text{CO}_2$  adsorption on SC10 (left panel) and SC20 (right panel) samples.

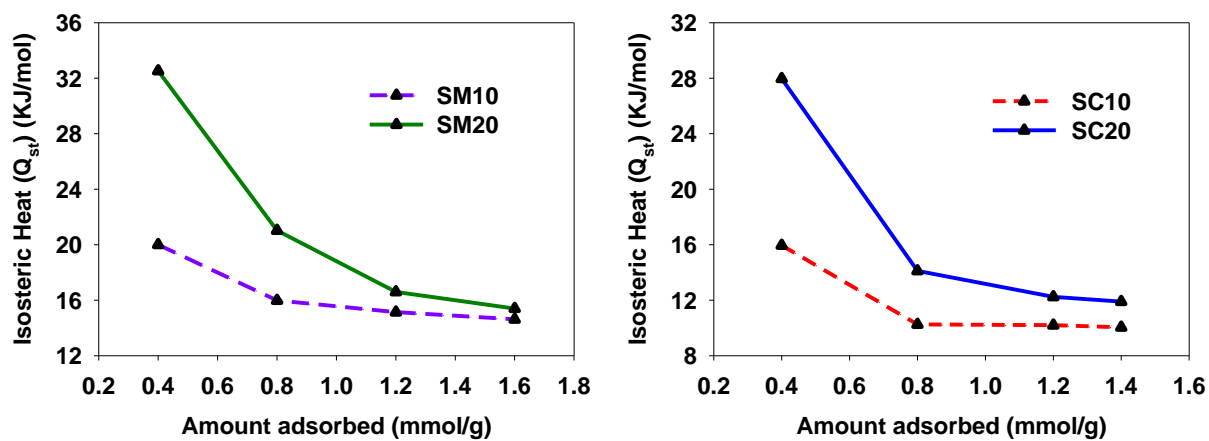

**Figure S14.** Variation of the isosteric heats of  $\text{CO}_2$  adsorption for the SM10 and SM20, SC10, and SC20 samples.

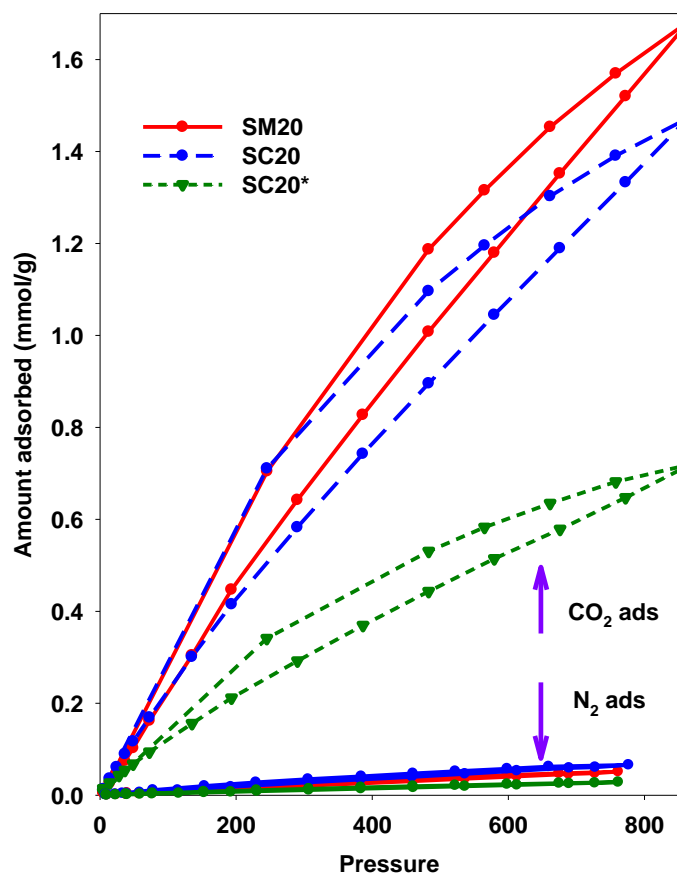

**Figure S15.** CO<sub>2</sub> and N<sub>2</sub> adsorption-desorption isotherms at 25 °C measured on the SM20, SC20, and SC20\* samples studied.
